# Supplementary material
Source: MDPI journal article supplement (https://www.mdpi.com/2199-8531/8/2/84)
Supplement: s1 [file s1]

**AGIL**

| Kruskal-Wallis test for equal medians |          | Mann-Whitney U test score |          |          |          |          | p-value |          |          |          |          |
|---------------------------------------|----------|---------------------------|----------|----------|----------|----------|---------|----------|----------|----------|----------|
|                                       |          | A                         | G        | I        | L        |          | A       | G        | I        | L        |          |
| H (chi2):                             | 39.64    | A                         |          | 1.07E+04 | 7607     | 9295     | A       |          | 0.009231 | 3.17E-10 | 2.18E-05 |
| Hc (tie corrected):                   | 39.8     | G                         | 1.07E+04 |          | 1.02E+04 | 1.15E+04 | G       | 0.009231 |          | 0.001376 | 0.1182   |
| p (same):                             | 1.18E-08 | I                         | 7607     | 1.02E+04 |          | 1.15E+04 | I       | 3.17E-10 | 0.001376 |          | 0.1096   |
|                                       |          | L                         | 9295     | 1.15E+04 | 1.15E+04 |          | L       | 2.18E-05 | 0.1182   | 0.1096   |          |

**Component A**

| Kruskal-Wallis test for equal medians |          | Mann-Whitney U test score |             |                    |                      |                | p-value              |             |                    |                      |                |
|---------------------------------------|----------|---------------------------|-------------|--------------------|----------------------|----------------|----------------------|-------------|--------------------|----------------------|----------------|
|                                       |          | Brand recognition         | Site design | Free-from products | Fat reduced products | Vegan products | Brand recognition    | Site design | Free-from products | Fat reduced products | Vegan products |
| H (chi2):                             | 300.3    | Brand recognition         |             | 1.14E+04           | 9513                 | 4204           | Brand recognition    | 0.08406     | 4.73E-05           | 3.37E-30             | 6.46E-26       |
| Hc (tie corrected):                   | 336.1    | Site design               | 1.14E+04    |                    | 7160                 | 1333           | Site design          | 0.08406     | 3.28E-12           | 3.68E-48             | 1.32E-41       |
| p (same):                             | 1.74E-71 | Free-from products        | 9513        | 7160               |                      | 5815           | Free-from products   | 4.73E-05    | 3.28E-12           | 1.26E-21             | 1.59E-17       |
|                                       |          | Fat reduced products      | 4204        | 1333               | 5815                 |                | Fat reduced products | 3.37E-30    | 3.68E-48           |                      | 0.4305         |
|                                       |          | Vegan products            | 4825        | 2135               | 6515                 | 1.24E+04       | Vegan products       | 6.46E-26    | 1.32E-41           | 1.59E-17             |                |

**Component G**

| Kruskal-Wallis test for equal medians |          | Mann-Whitney U test score |                       |                |                       |             | p-value               |                       |                |                       |             |
|---------------------------------------|----------|---------------------------|-----------------------|----------------|-----------------------|-------------|-----------------------|-----------------------|----------------|-----------------------|-------------|
|                                       |          | Taste e texture           | Information available | Certifications | Health benefits links | Product use | Taste e texture       | Information available | Certifications | Health benefits links | Product use |
| H (chi2):                             | 125.8    | Taste e texture           |                       | 1.18E+04       | 8109                  | 6305        | Taste e texture       | 0.2281                | 5.64E-09       | 3.43E-16              | 1.58E-06    |
| Hc (tie corrected):                   | 133.8    | Information available     | 1.18E+04              |                | 6919                  | 5075        | Information available | 0.2281                | 3.42E-13       | 6.09E-22              | 3.24E-10    |
| p (same):                             | 6.05E-28 | Certifications            | 8109                  | 6919           |                       | 1.08E+04    | Certifications        | 5.64E-09              | 3.42E-13       | 0.008879              | 0.1748      |
|                                       |          | Health benefits links     | 6305                  | 5075           | 1.08E+04              |             | Health benefits links | 3.43E-16              | 6.09E-22       |                       | 5.40E-05    |
|                                       |          | Product use               | 8922                  | 7713           | 1.17E+04              | 9681        | Product use           | 1.58E-06              | 3.24E-10       | 0.1748                |             |

**Component I**

| Kruskal-Wallis test for equal medians |          | Mann-Whitney U test score |                       |                     |               |            | p-value               |                       |                     |               |            |
|---------------------------------------|----------|---------------------------|-----------------------|---------------------|---------------|------------|-----------------------|-----------------------|---------------------|---------------|------------|
|                                       |          | Price                     | International profile | Interactive website | User friendly | E-commerce | Price                 | International profile | Interactive website | User friendly | E-commerce |
| H (chi2):                             | 120.7    | Price                     |                       | 9743                | 1.24E+04      | 7957       | Price                 | 0.0001814             | 0.6714              | 2.46E-09      | 0.09992    |
| Hc (tie corrected):                   | 126.1    | International profile     | 9743                  |                     | 9326          | 3695       | International profile | 0.0001814             | 1.45E-05            | 2.48E-29      | 1.79E-08   |
| p (same):                             | 2.67E-26 | Interactive website       | 1.24E+04              | 9326                |               | 6052       | Interactive website   | 0.6714                | 1.45E-05            | 5.94E-17      | 0.01266    |
|                                       |          | User friendly             | 7957                  | 3695                | 6052          |            | User friendly         | 2.46E-09              | 2.48E-29            |               | 3.43E-05   |
|                                       |          | E-commerce                | 1.13E+04              | 8215                | 1.07E+04      | 9426       | E-commerce            | 0.09992               | 1.79E-08            | 0.01266       |            |

**Component L**

| Kruskal-Wallis test for equal medians |          | Mann-Whitney U test score    |          |                   |                              |                       | p-value                      |          |                   |                              |                       |
|---------------------------------------|----------|------------------------------|----------|-------------------|------------------------------|-----------------------|------------------------------|----------|-------------------|------------------------------|-----------------------|
|                                       |          | Communication of innovation  | Origin   | History-tradition | Environmental sustainability | Social sustainability | Communication of innovation  | Origin   | History-tradition | Environmental sustainability | Social sustainability |
| H (chi2):                             | 95.48    | Communication of innovation  |          | 1.11E+04          | 1.05E+04                     | 8724                  | Communication of innovation  | 0.03728  | 0.004397          | 4.36E-07                     | 2.47E-08              |
| Hc (tie corrected):                   | 100      | Origin                       | 1.11E+04 |                   | 1.26E+04                     | 7914                  | Origin                       | 0.03728  | 0.8033            | 1.42E-09                     | 4.07E-11              |
| p (same):                             | 9.83E-21 | History-tradition            | 1.05E+04 | 1.26E+04          |                              | 7267                  | History-tradition            | 0.004397 | 0.8033            | 7.20E-12                     | 9.89E-14              |
|                                       |          | Environmental sustainability | 8724     | 7914              | 7267                         |                       | Environmental sustainability | 4.36E-07 | 1.42E-09          |                              | 0.6272                |
|                                       |          | Social sustainability        | 8310     | 7480              | 6803                         | 1.24E+04              | Social sustainability        | 2.47E-08 | 4.07E-11          | 0.6272                       |                       |

**Figure S1. Results of the Kruskal-Wallis H and the Mann-Whitney U tests.**
